# Supplementary material for: Peripheral complement proteins in schizophrenia: A systematic review and meta-analysis of serological studies
Source: PubMed Central journal article supplement (PMC7594643; doi:10.1016/j.schres.2020.05.036), 2020-08
Supplement: mmc1.pdf [file mmc1.pdf]

## **SUPPLEMENTARY APPENDICES**

**Appendix A:** Search terms used for each database

**Appendix B:** Risk of bias assessment based on the Newcastle Ottawa scale for case control studies

**Appendix C:** Assessment of publication bias and small-study effects

**Appendix D:** Results of meta-regression analyses

## Appendix A: Search terms used for each database

| <b>PubMed<br/>Medline</b> |                                                                                                                                                                                                 |
|---------------------------|-------------------------------------------------------------------------------------------------------------------------------------------------------------------------------------------------|
| <b>1</b>                  | ("Schizophrenia"[Mesh]) OR "Psychotic Disorders"[Mesh] OR<br>(((schizophrenia[Title/Abstract]) OR schizophrenic[Title/Abstract]) OR<br>psychosis[Title/Abstract]) OR psychotic[Title/Abstract]) |
| <b>2</b>                  | ("Complement System Proteins"[Mesh]) OR complement[Title/Abstract]                                                                                                                              |
| <b>3</b>                  | <b>1 AND 2</b>                                                                                                                                                                                  |

| <b>EMBASE<br/>Elsevier</b> |                                                                                                                              |
|----------------------------|------------------------------------------------------------------------------------------------------------------------------|
| <b>1</b>                   | 'schizophrenia'/exp OR schizoprenia:ti,ab OR schizophrenic:ti,ab OR 'psychosis'/exp<br>OR psychosis:ti,ab OR psychotic:ti,ab |
| <b>2</b>                   | 'complement'/exp OR complement:ti,ab,de                                                                                      |
| <b>3</b>                   | <b>1 AND 2</b>                                                                                                               |
| <b>4</b>                   | <b>#3 AND [embase]/lim NOT ([embase]/lim AND [medline]/lim)<br/>LIMITED TO EMBASE ONLY RECORDS, EXCLUDING MEDLINE</b>        |

| <b>PSYCINFO<br/>Ebscohost</b> |                                                                                                                                                                                                                                                                                                                                                                                               |
|-------------------------------|-----------------------------------------------------------------------------------------------------------------------------------------------------------------------------------------------------------------------------------------------------------------------------------------------------------------------------------------------------------------------------------------------|
| <b>1</b>                      | DE "Schizophrenia" OR DE "Acute Schizophrenia" OR DE "Catatonic Schizophrenia" OR DE "Childhood Schizophrenia" OR DE "Paranoid Schizophrenia" OR DE "Process Schizophrenia" OR DE "Schizophrenia (Disorganized Type)" OR DE "Schizophreniform Disorder" OR DE "Undifferentiated Schizophrenia"                                                                                                |
| <b>2</b>                      | DE "Psychosis" OR DE "Acute Psychosis" OR DE "Affective Psychosis" OR DE "Alcoholic Psychosis" OR DE "Capgras Syndrome" OR DE "Childhood Psychosis" OR DE "Chronic Psychosis" OR DE "Experimental Psychosis" OR DE "HallucinosiS" OR DE "Paranoia (Psychosis)" OR DE "Postpartum Psychosis" OR DE "Reactive Psychosis" OR DE "Schizophrenia" OR DE "Senile Psychosis" OR DE "Toxic Psychoses" |
| <b>3</b>                      | (TI schizophrenia OR schizophrenic OR psychosis OR psychotic) OR (AB schizophrenia OR schizophrenic OR psychosis OR psychotic)                                                                                                                                                                                                                                                                |
| <b>4</b>                      | <b>1 OR 2 OR 3</b>                                                                                                                                                                                                                                                                                                                                                                            |
| <b>5</b>                      | (TI complement) OR (AB complement)                                                                                                                                                                                                                                                                                                                                                            |
| <b>6</b>                      | <b>4 AND 5</b>                                                                                                                                                                                                                                                                                                                                                                                |

**Appendix B: Risk of bias assessment based on the  
Newcastle-Ottawa scale for case-control studies**

| <b>Study</b>                           | <b>Selection score<br/>(maximum 4)</b> | <b>Comparability score<br/>(maximum 2)</b> | <b>Exposure score<br/>(maximum 3)</b> | <b>Total score<br/>(maximum 9)</b> |
|----------------------------------------|----------------------------------------|--------------------------------------------|---------------------------------------|------------------------------------|
| <b>Ali et al 2017</b>                  | 3                                      | 2                                          | 2                                     | 7                                  |
| <b>Boyajyan et al<br/>2010</b>         | 2                                      | 0                                          | 0                                     | 2                                  |
| <b>Cazzullo et al<br/>1998</b>         | 1                                      | 1                                          | 0                                     | 2                                  |
| <b>Foldager et al<br/>2012</b>         | 0                                      | 1                                          | 0                                     | 1                                  |
| <b>Fontana et al<br/>1980</b>          | 1                                      | 0                                          | 0                                     | 1                                  |
| <b>Hakobyan et al<br/>2004</b>         | 2                                      | 0                                          | 0                                     | 2                                  |
| <b>Hong et al 2016</b>                 | 2                                      | 2                                          | 0                                     | 4                                  |
| <b>Idonije et al 2012</b>              | 1                                      | 2                                          | 0                                     | 3                                  |
| <b>Ji et al 2019</b>                   | 3                                      | 0                                          | 0                                     | 3                                  |
| <b>Kucharska-<br/>Mazur et al 2014</b> | 2                                      | 2                                          | 0                                     | 4                                  |
| <b>Laskaris et al<br/>2018</b>         | 1                                      | 2                                          | 1                                     | 4                                  |
| <b>Li et al 2012</b>                   | 2                                      | 1                                          | 0                                     | 3                                  |
| <b>Li et al 2016</b>                   | 1                                      | 2                                          | 1                                     | 4                                  |
| <b>Maes et al 1997</b>                 | 1                                      | 2                                          | 0                                     | 3                                  |
| <b>Mayilyan et al<br/>2006</b>         | 0                                      | 2                                          | 0                                     | 2                                  |
| <b>Mayilyan et al<br/>2008</b>         | 3                                      | 1                                          | 0                                     | 4                                  |
| <b>Ramsey et al 2013</b>               | 2                                      | 2                                          | 1                                     | 5                                  |
| <b>Santos-Soria et al<br/>2012</b>     | 1                                      | 2                                          | 0                                     | 3                                  |
| <b>Sasaki et al 1994</b>               | 1                                      | 0                                          | 0                                     | 1                                  |
| <b>Schwarz et al<br/>2012</b>          | 3                                      | 2                                          | 0                                     | 5                                  |
| <b>Spivak et al 1989</b>               | 0                                      | 1                                          | 0                                     | 1                                  |
| <b>Spivak et al 1993</b>               | 1                                      | 1                                          | 0                                     | 2                                  |
| <b>Walls-Bass et al<br/>2018</b>       | 2                                      | 2                                          | 1                                     | 5                                  |
| <b>Wong et al 1996</b>                 | 0                                      | 1                                          | 0                                     | 1                                  |

Wells G, Shea B, O'Connell D, Peterson J, Welch V, Losos M, et al. The Newcastle-Ottawa Scale (NOS) for assessing the quality of nonrandomised studies in meta-analyses. Available from: [http://www.ohri.ca/programs/clinical\\_epidemiology/oxford.asp](http://www.ohri.ca/programs/clinical_epidemiology/oxford.asp).

## Appendix C: Assessment of publication bias and small-study effects

### 1) Funnel plot and Egger's test for complement component 3

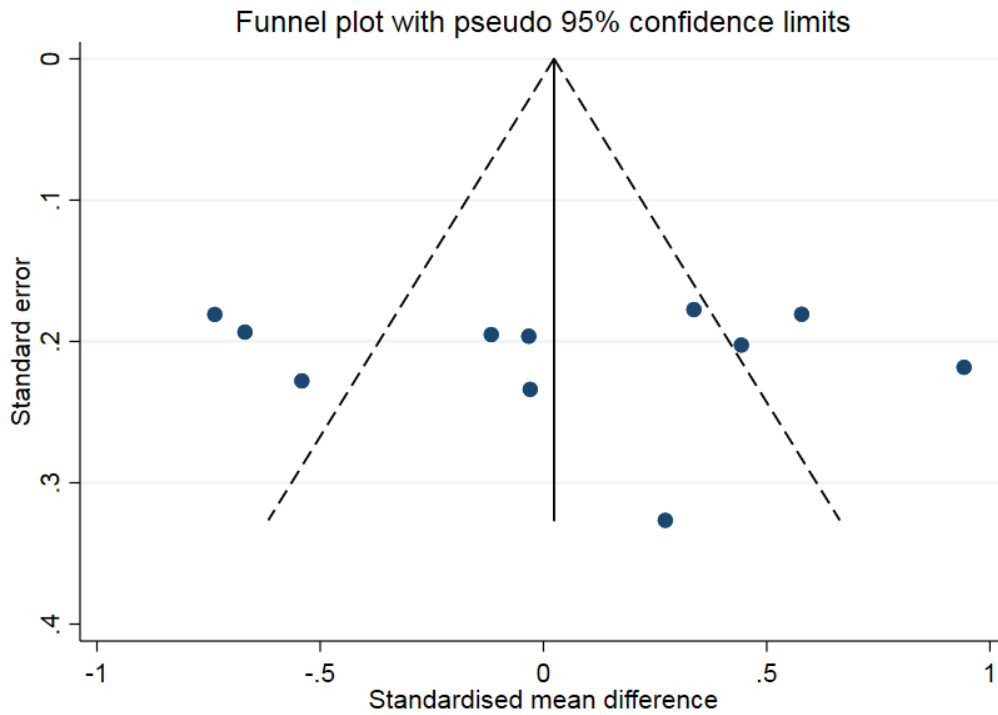

Egger's test for small-study effects:

$t=0.28, p=0.789$

### 2) Funnel plot and Egger's test for complement component 4

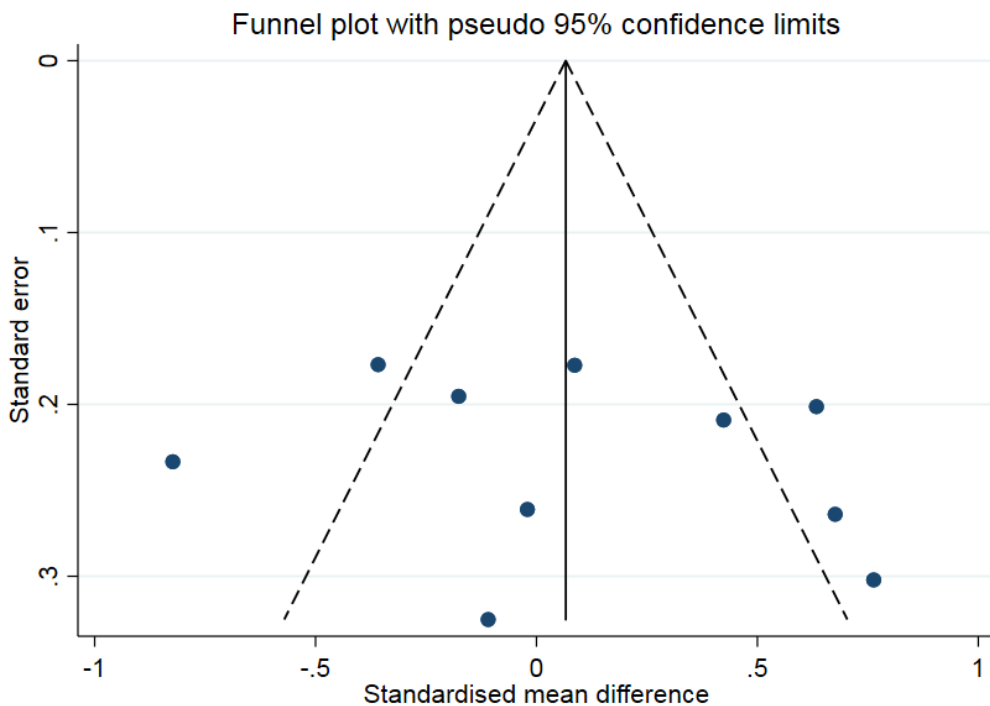

Egger's test for small-study effects:

$t=0.67, p=0.524$

## Appendix D: Results of meta-regression analyses

### 1) Meta-regression analyses for complement component 3

| Characteristic                                    | Number of studies | Coefficient | Standard error | t     | p     | Lower 95% confidence interval | Upper 95% confidence interval |
|---------------------------------------------------|-------------------|-------------|----------------|-------|-------|-------------------------------|-------------------------------|
| Current antipsychotic use (yes vs. no)            | 11                | -0.29       | 0.33           | -0.86 | 0.412 | -1.05                         | 0.47                          |
| Hospitalisation status (inpatient vs. outpatient) | 11                | -0.63       | 0.32           | -1.96 | 0.082 | -1.36                         | 0.10                          |
| Assay (ELISA vs radial immunodiffusion/other)     | 11                | -0.15       | 0.36           | -0.43 | 0.679 | -0.96                         | 0.65                          |
| Assay (radial immunodiffusion vs ELISA/other)     | 11                | -0.36       | 0.37           | -0.97 | 0.357 | -1.20                         | 0.48                          |
| Assay (other vs ELISA/radial immunodiffusion)     | 11                | 0.45        | 0.33           | 1.38  | 0.200 | -0.29                         | 1.19                          |

### 2) Meta-regression analyses for complement component 4

| Characteristic                                      | Number of studies | Coefficient | Standard error | t     | p     | Lower 95% confidence interval | Upper 95% confidence interval |
|-----------------------------------------------------|-------------------|-------------|----------------|-------|-------|-------------------------------|-------------------------------|
| Current antipsychotic use (yes vs. no) <sup>a</sup> | 9                 | 0.01        | 0.37           | 0.02  | 0.988 | -0.86                         | 0.87                          |
| Hospitalisation status (inpatient vs. outpatient)   | 10                | -0.60       | 0.27           | -2.20 | 0.059 | -1.22                         | 0.03                          |
| Assay (ELISA vs radial immunodiffusion/other)       | 10                | 0.09        | 0.37           | 0.23  | 0.821 | -0.77                         | 0.94                          |
| Assay (radial immunodiffusion vs ELISA/other)       | 10                | -0.31       | 0.42           | -0.73 | 0.488 | -1.28                         | 0.66                          |
| Assay (other vs ELISA/radial immunodiffusion)       | 10                | 0.12        | 0.34           | 0.34  | 0.740 | -0.67                         | 0.90                          |

<sup>a</sup> Medication status was unable to be confirmed for one study (Ji et al 2019) and thus this study was not included in this specific analysis.

ELISA: enzyme-linked immunosorbent assay
